# Supplementary material
Source: PubMed Central journal article supplement (PMC5714752)
Supplement: ajcr0007-2234-f9.pdf [file ajcr0007-2234-f9.pdf]

# AKIP1 promoted epithelial-mesenchymal transition of non-small-cell lung cancer

**Supplementary Table 1.** Primers used in this study

| Name          | Sequences (5'-3')          |
|---------------|----------------------------|
| Real-time PCR |                            |
| GAPDH-F       | 5'-GCACCGTCAAGGCTGAGAAC-3' |
| GAPDH-R       | 5'-TGGTGAAGACGCCAGTGGA-3'  |
| AKIP1-F       | 5'-CATGGACAACCTGTTGGCGG-3' |
| AKIP1-R       | 5'-CTGTTTCTCTAGGTGGGGCG-3' |
| Vimentin-F    | 5'-TTGAACGCAAAGTGAATC-3'   |
| Vimentin-R    | 5'-AGGTCAGGCTTGAAACA-3'    |
| Fibronectin-F | 5'-TGTATGGAGGAAGCCGAGTT-3' |
| Fibronectin-R | 5'-GCAGCGTTTGCATGGT-3'     |
| E-cadherin-F  | 5'-CTGAGAACGAGGCTAACG-3'   |
| E-cadherin-R  | 5'-TTCACATCCAGCACATCC-3'   |
| Snail-F       | 5'-TTACCTTCCAGCAGCCCTAC-3' |
| Snail-R       | 5'-AGCCTTCCCCTGTCTC-3'     |
| Slug-F        | 5'-CCTCCATCTGACACCTCC-3'   |
| Slug-R        | 5'-CCCAGGCTCACATATTCC-3'   |
| ZEB1-F        | 5'-AAGTGGCGGTAGATGGTA-3'   |
| ZEB1-R        | 5'-TTGTAGCGACTGGATTTT-3'   |
| ZEB2-F        | 5'-TTCTGCGACATAAATACG-3'   |
| ZEB2-R        | 5'-GAGTGAAGCCTTGAGTGC-3'   |
| Twist-F       | 5'-CGACGACAGCCTGAGCAACA-3' |
| Twist-R       | 5'-CCACAGCCCGCAGACTTCTT-3' |
| ChIP primers  |                            |
| ZEB1-P1-F     | 5'-GCCCAAATAACTAAACC-3'    |
| ZEB1-P1-R     | 5'-CTACCGAATCAGGTCATA-3'   |
| ZEB1-P2-F     | 5'-CAAGCAAAGCAAGGACAC-3'   |
| ZEB1-P2-R     | 5'-TTCTTGGGCATTTTGAGA-3'   |
| ZEB1-P3-F     | 5'-TTCTCAAATGCCCAAGA-3'    |
| ZEB1-P3-R     | 5'-CACATAGTAGGTGCTCAA-3'   |
| ZEB1-P4-F     | 5'-TTTATTGAGCACCTACTA-3'   |
| ZEB1-P4-R     | 5'-TGGGACCAACTTTATGGA-3'   |
| ZEB1-P5-F     | 5'-AAGACGTTTCCTTATTTCG-3'  |
| ZEB1-P5-R     | 5'-TTTATCCTTGACTTGGA-3'    |
| ZEB1-P6-F     | 5'-TAAAATCAGCAATCTATCAG-3' |
| ZEB1-P6-R     | 5'-CTTGTCCTTCCCCAT-3'      |
